# Supplementary material for: Forensic Features and Population Genetic Structure of Dong, Yi, Han, and Chuanqing Human Populations in Southwest China Inferred From Insertion/Deletion Markers
Source: Front Genet. 2020 Apr 30;11:360. doi: 10.3389/fgene.2020.00360 (PMC7205039; doi:10.3389/fgene.2020.00360)
Supplement: TABLE S1 — Population size, geographical locations and references information of the two datasets used in this study. [file Table_1.XLSX]

## Sheet: Dataset 1
Table S1A ：Population sample information from the first dataset of 93 worldwide reference populations about population size, geographical positions and Reference.
Sample Size	Region	Population	Reference
125	Yunnan-Dali	Yunnan-Bai	Yang, C.H., Yin, C.Y., Shen, C.M., Guo, Y.X., Dong, Q., Yan, J.W., et al. (2017). Genetic variation and forensic efficiency of autosomal insertion/deletion polymorphisms in Chinese Bai ethnic group: phylogenetic analysis to other populations. Oncotarget 24, 39582-39591. doi：10.18632/oncotarget.17137
50	Sanjiang Dong Autonomous County, Liuzhou City, Guangxi Zhuang Autonomous Region	Guangxi-Dong	Wang, L., Lv, M., Zaumsegel, D., Zhang, L., Liu, F., Xiang, J., et al. (2016). A comparative study of insertion/deletion polymorphisms applied among Southwest, South and Northwest Chinese populations using Investigator((R)) DIPplex. Forensic Sci Int Genet 21, 10-14. doi: 10.1016/j.fsigen.2015.08.005
129	Chengdu	Chengdu-Han
136	Sichuan-Aba Tibetan and Qiang Autonomous Prefecture	Sichuan-Aba-Tibetan1
54	Sichuan-Liangshan	Sichuan-Yi
49	Guangxi-Liuzhou	Liuzhou-Zhuang
50	Rongshui Miao Autonomous County, Liuzhou City, Guangxi Zhuang Autonomous Region	Guangxi-Miao
123	Xinjiang Uygur Autonomous Region	Xinjiang-Uyghur1
300	Guangdong	Guangdong-Han	洪丽, 王小广, 刘素娟, 张胤鸣, 欧雪玲, 陈勇, et al. (2013). 30个插入/缺失多态性位点在中国广东汉族人群中的遗传多态性. 中山大学学报（医学科学版）, 34(2), 299-304.
565	Shanghai	Shanghai-Han	Wang, Z., Zhang, S., Zhao, S., Hu, Z., Sun, K., and Li, C. (2014). Population genetics of 30 insertion-deletion polymorphisms in two Chinese populations using Qiagen Investigator(R) DIPplex kit. Forensic Sci Int Genet 11, e12-14. doi: 10.1016/j.fsigen.2014.03.017.
119	Fujian	Fujian-She
97	Beijing	Beijing-Han	Wei, Y.L., Qin, C.J., Dong, H., Jia, J., and Li, C.X. (2014). A validation study of a multiplex INDEL assay for forensic use in four Chinese populations. Forensic Sci Int Genet 9, e22-25. doi: 10.1016/j.fsigen.2013.09.002.
94	Xinjiang Urumuqi City	Xinjiang-Uyghur2
96	Ili Kazakh Autonomous Prefecture	Xinjiang-Kazakh1
94	Lhasa-Tibet	Lhasa-Tibetan1
501	Jiangsu	Jiangsu-Han	Li, Z., Xu, J., Chen, P., Yin, C., Hu, L., Huang, H., et al. (2018). Forensic efficiency and genetic divergence of 30 autosomal InDels in Chinese Han population from Jiangsu province. Forensic Sci Int Genet 37, e17-e19. doi: 10.1016/j.fsigen.2018.08.006.
565	Huadong	Huadong-Han	胡真, 王正, 张素华，赵书民，朱如心, 孙宽, et al. (2014). 30个indel位点在华东汉族和畲族人群的法医学应用. 法医学杂志, 30(5), 337-341.
119	Huadong	Huadong-She
251	Japan	Japanese	Nunotani, M., Shiozaki, T., Sato, N., Kamei, S., Takatsu, K., Hayashi, T., et al. (2015). Analysis of 30 insertion-deletion polymorphisms in the Japanese population using the Investigator DIPplex(R) kit. Leg Med (Tokyo) 17(6), 467-470. doi: 10.1016/j.legalmed.2015.10.002
100	Korea	Korean	Kim, E.H., Lee, H.Y., Yang, I.S., Yang, W.I., and Shin, K.J. (2014). Population data for 30 insertion-deletion markers in a Korean population. Int J Legal Med 128(1), 51-52. doi: 10.1007/s00414-013-0851-6
373	South-Korea	South-Korean	Seong, K.M., Park, J.H., Hyun, Y.S., Kang, P.W., Choi, D.H., Han, M.S., et al. (2014). Population genetics of insertion-deletion polymorphisms in South Koreans using Investigator DIPplex kit. Forensic Sci Int Genet 8(1), 80-83. doi: 10.1016/j.fsigen.2013.06.013.
403	Zunyi	Zunyi-Miao	Chen, P., Luo, L., Gao, H., Wu, J., Wang, Y., He, G., et al. (2019). Forensic performance of 30 InDels included in the Investigator DIPplex system in Miao population and comprehensive genetic relationship in China. Int J Legal Med 133(5), 1389-1392. doi: 10.1007/s00414-019-02057-6.
126	Taiwan	Taiwanese	Pepinski, W., Abreu-Glowacka, M., Koralewska-Kordel, M., Michalak, E., Kordel, K., Niemcunowicz-Janica, A., et al. (2013). Population genetics of 30 INDELs in populations of Poland and Taiwan. Mol Biol Rep 40(7), 4333-4338. doi: 10.1007/s11033-013-2521-7.
122	Poland	Poles
123	Tibet	Tibet-Tibetan	Guo, Y., Shen, C., Meng, H., Dong, Q., Kong, T., Yang, C., et al. (2016). Population Differentiations and Phylogenetic Analysis of Tibet and Qinghai Tibetan Groups Based on 30 InDel Loci. DNA Cell Biol 35(12), 787-794. doi: 10.1089/dna.2016.3395.
122	Qinghai	Qinghai-Tibetan1
530	Qinghai	Qinghai-Tibetan2	Jian, H., Wang, L., Wang, H., Bai, X., Lv, M., and Liang, W. (2019). Population genetic analysis of 30 insertion-deletion (INDEL) loci in a Qinghai Tibetan group using the Investigator DIPplex Kit. Int J Legal Med 133(4), 1039-1041. doi: 10.1007/s00414-018-1954-x.
55	Tibet	Qamdo-Tibetan	Li, L., Ye, Y., Song, F., Wang, Z., and Hou, Y. (2019). Genetic structure and forensic parameters of 30 InDels for human identification purposes in 10 Tibetan populations of China. Forensic Sci Int Genet 40, e219-e227. doi: 10.1016/j.fsigen.2019.02.002.
55	Tibet	Xigazê-Tibetan
52	Tibet	Shannan-Tibetan
58	Tibet	Nyingchi-Tibetan
64	Tibet	Lhasa-Tibetan2
38	Tibet	Ngari-Tibetan
43	Tibet	Nagqu-Tibetan
56	Sichuan	Sichuan-Garzê-Tibetan
51	Sichuan	Sichuan-Aba-Tibetan2
50	Yunnan	Yunnan-Diqing-Tibetan
236	Enshi Tujia and Miao Autonomous Prefecture, Hubei Province	Hubei-Tujia	Shen, C., Zhu, B., Yao, T., Li, Z., Zhang, Y., Yan, J., et al. (2016). A 30-InDel Assay for Genetic Variation and Population Structure Analysis of Chinese Tujia Group. Sci Rep 6, 36842. doi: 10.1038/srep36842.
262	America	US-Caucasian	Fondevila, M., Phillips, C., Santos, C., Pereira, R., Gusmao, L., Carracedo, A., et al. (2012). Forensic performance of two insertion-deletion marker assays. Int J Legal Med 126(5), 725-737. doi: 10.1007/s00414-012-0721-7.
50	America	US-East-Asian
260	America	US-African-American
140	America	US-Hispanic
300	Vietnam	Vietnamese	Du, W., Peng, Z., Feng, C., Zhu, B., Wang, B., Yue, W., et al. (2017). Forensic efficiency and genetic variation of 30 InDels in Vietnamese and Nigerian populations. Oncotarget 8(51), 88934-88940.
140	Nigeria	Nigerian
122	Yunnan	Yunnan-Yi	Zhang, Y.D., Shen, C.M., Jin, R., Li, Y.N., Wang, B., Ma, L.X., et al. (2015). Forensic evaluation and population genetic study of 30 insertion/deletion polymorphisms in a Chinese Yi group. Electrophoresis 36(9-10), 1196-1201. doi: 10.1002/elps.201500003.
80	America-Texas	US-Asian	LaRue, B.L., Ge, J., King, J.L., and Budowle, B. (2012). A validation study of the Qiagen Investigator DIPplex(R) kit; an INDEL-based assay for human identification. Int J Legal Med 126(4), 533-540. doi: 10.1007/s00414-012-0667-9.
77	America-Texas	African-American
75	America-Texas	Caucasian
69	America-Texas	Southwestern-Hispanic
115	Qinghai	Qinghai-Salar	Ma, R., Shen, C., Wei, Y., Jin, X., Guo, Y., Mu, Y., et al. (2018). Genetic differentiation and forensic efficiency evaluation for Chinese Salar ethnic minority based on a 5-dye multiplex insertion and deletion panel. Gene 660, 41-50. doi: 10.1016/j.gene.2018.03.058.
205	Guizhou-Guiyang	Guizhou-Bouyei	He, G., Ren, Z., Guo, J., Zhang, F., Zou, X., Zhang, H., et al. (2019). Population genetics, diversity and forensic characteristics of Tai-Kadai-speaking Bouyei revealed by insertion/deletions markers. Mol Genet Genomics. doi: 10.1007/s00438-019-01584-6.
200	Guangxi	Guangxi-Zhuang	Du, W., Feng, C., Yao, T., Xiao, C., Huang, H., Wu, W., et al. (2019). Genetic variation and forensic efficiency of 30 indels for three ethnic groups in Guangxi: relationships with other populations. PeerJ 7, e6861. doi: 10.7717/peerj.6861.
162	Guangxi	Guangxi-Yao
152	Guangxi	Guangxi-Kelao
502	Zunyi	Zunyi-Gelao	He, G., Wang, Z., Zou, X., Wang, M., Liu, J., Wang, S., et al. (2019b). Tai-Kadai-speaking Gelao population: Forensic features, genetic diversity and population structure. Forensic Sci Int Genet 40, e231-e239. doi: 10.1016/j.fsigen.2019.03.013.
139	Gansu	Gansu-Yugur	Yang, C.H., Jin, X.Y., Guo, Y.X., Cui, W., Chen, C., Meng, H.T., et al. (2019). Genetic distribution analyses and population background explorations of Gansu Yugur and Guizhou Miao groups via InDel markers. J Hum Genet 64(6), 535-543. doi: 10.1038/s10038-019-0595-3.
274	Guizhou	Guizhou-Miao
132	Bangladesh	Bangladeshi	Akhteruzzaman, S., Das, S.A., Hosen, I., and Ferdous, A. (2013). Genetic polymorphism of 30 InDel markers for forensic use in Bangladeshi population. Forensic Science International: Genetics Supplement Series 4(1), e348-e349. doi: 10.1016/j.fsigss.2013.10.177.
101	Iraq	Iraqi	Tomas, C., Poulsen, L., Drobnic, K., Ivanova, V., Jankauskiene, J., Bunokiene, D., et al. (2016). Thirty autosomal insertion-deletion polymorphisms analyzed using the Investigator((R)) DIPplex Kit in populations from Iraq, Lithuania, Slovenia, and Turkey. Forensic Sci Int Genet 25, 142-144. doi: 10.1016/j.fsigen.2016.08.006.
110	Lithuania	Lithuanian
157	Slovenia	Slovenian
93	Turkey	Turks
169	Gansu	Gansu-Dongxiang	Zhu, B., Lan, Q., Guo, Y., Xie, T., Fang, Y., Jin, X., et al. (2018). Population Genetic Diversity and Clustering Analysis for Chinese Dongxiang Group With 30 Autosomal InDel Loci Simultaneously Analyzed. Front Genet 9, 279. doi: 10.3389/fgene.2018.00279.
487	Xinjiang	Xinjiang-Hui	Xie, T., Guo, Y., Chen, L., Fang, Y., Tai, Y., Zhou, Y., et al. (2018). A set of autosomal multiple InDel markers for forensic application and population genetic analysis in the Chinese Xinjiang Hui group. Forensic Science International: Genetics 35, 1-8. doi: 10.1016/j.fsigen.2018.03.007.
513	Xinjiang Uygur Autonomous Region	Xinjiang-Kazakh2	Kong, T., Chen, Y., Guo, Y., Wei, Y., Jin, X., Xie, T., et al. (2017). Autosomal InDel polymorphisms for population genetic structure and differentiation analysis of Chinese Kazak ethnic group. Oncotarget 8(34), 56651.
295	Xinjiang Uygur Autonomous Region	Xinjiang-Kyrgyz	Guo, Y., Chen, C., Jin, X., Cui, W., Wei, Y., Wang, H., et al. (2018). Autosomal DIPs for population genetic structure and differentiation analyses of Chinese Xinjiang Kyrgyz ethnic group. Scientific Reports 8(1). doi: 10.1038/s41598-018-29010-8.
223	Xinjiang Uygur Autonomous Region	Xinjiang-Xibe	Meng, H.T., Zhang, Y.D., Shen, C.M., Yuan, G.L., Yang, C.H., Jin, R., et al. (2015). Genetic polymorphism analyses of 30 InDels in Chinese Xibe ethnic group and its population genetic differentiations with other groups. Sci Rep 5, 8260. doi: 10.1038/srep08260.
136	Xinjiang Uygur Autonomous Region	Xinjiang-Uyghur3	Mei, T., Shen, C.M., Liu, Y.S., Meng, H.T., Zhang, Y.D., Guo, Y.X., et al. (2016). Population genetic structure analysis and forensic evaluation of Xinjiang Uigur ethnic group on genomic deletion and insertion polymorphisms. Springerplus 5(1), 1087. doi: 10.1186/s40064-016-2730-3.
196	Hungary	Hungarian	Kis, Z., Zalan, A., Volgyi, A., Kozma, Z., Domjan, L., and Pamjav, H. (2012). Genome deletion and insertion polymorphisms (DIPs) in the Hungarian population. Forensic Sci Int Genet 6(5), e125-126. doi: 10.1016/j.fsigen.2011.09.004.
80	Denmark	Dane	Friis, S.L., Borsting, C., Rockenbauer, E., Poulsen, L., Fredslund, S.F., Tomas, C., et al. (2012). Typing of 30 insertion/deletions in Danes using the first commercial indel kit--Mentype(R) DIPplex. Forensic Sci Int Genet 6(2), e72-74. doi: 10.1016/j.fsigen.2011.08.002.
151	Finland	Finns	Neuvonen, A.M., Palo, J.U., Hedman, M., and Sajantila, A. (2012). Discrimination power of Investigator DIPplex loci in Finnish and Somali populations. Forensic Sci Int Genet 6(4), e99-102. doi: 10.1016/j.fsigen.2011.09.005.
175	Somalia	Somalian
127	Northern-Portugal	North-Portuguese	Carvalho, A., and Pinheiro, M.F. (2013). Population data of 30 insertion/delection polymorphisms from a sample taken in the North of Portugal. Int J Legal Med 127(1), 65-67. doi: 10.1007/s00414-012-0693-7.
108	Southern Portugal	South-Portuguese	da Silva, C.V., Matos, S., Costa, H.A., Morais, P., Dos Santos, R.M., Espinheira, R., et al. (2013). Genetic portrait of south Portugal population with InDel markers. Forensic Sci Int Genet 7(4), e101-103. doi: 10.1016/j.fsigen.2013.03.009.
71	Central-Spain	Central-Spanish	Martin, P., Garcia, O., Heinrichs, B., Yurrebaso, I., Aguirre, A., and Alonso, A. (2013). Population genetic data of 30 autosomal indels in Central Spain and the Basque Country populations. Forensic Sci Int Genet 7(2), e27-30. doi: 10.1016/j.fsigen.2012.10.003.
60	Spain	Basque
55	Czech	Czech	Zidkova, A., Horinek, A., Kebrdlova, V., and Korabecna, M. (2011). Application of the new insertion–deletion polymorphism kit for forensic identification and parentage testing on the Czech population. International Journal of Legal Medicine 127(1), 7-10. doi: 10.1007/s00414-011-0649-3.
200	Italy	North–East-Italian	Turrina, S., Filippini, G., and De Leo, D. (2011). Forensic evaluation of the Investigator DIPplex typing system. Forensic Science International: Genetics Supplement Series 3(1), e331-e332. doi: 10.1016/j.fsigss.2011.09.028.
101	Cape Town, South Africa	Afrikaner	Hefke, G., Davison, S., and D'Amato, M.E. (2015). Forensic performance of Investigator DIPplex indels genotyping kit in native, immigrant, and admixed populations in South Africa. Electrophoresis 36(24), 3018-3025. doi: 10.1002/elps.201500243.
102	Cape Town, South Africa	Asian Indian
104	Cape Town, South Africa	Cape Colored
102	Cape Town, South Africa	Xhosa
103	Cape Town, South Africa	Zulu
90	West-Mexico	Amerindian-West-Mexico	Martinez-Cortes, G., Garcia-Aceves, M., Favela-Mendoza, A.F., Munoz-Valle, J.F., Velarde-Felix, J.S., and Rangel-Villalobos, H. (2016). Forensic parameters of the Investigator DIPplex kit (Qiagen) in six Mexican populations. Int J Legal Med 130(3), 683-685. doi: 10.1007/s00414-015-1242-y.
82	North-Mexico	Chihuahua-North-Mexican
50	West-Mexico	Jalisco-West-Mexican
67	Center-Mexico	Mexico-Center-Mexican
56	Center-Mexico	Veracruz-Center-Mexican
76	Southeast-Mexico	Yucatan-Southeast-Mexican
253	Tran	Iranian	Poulsen, L., Farzad, M.S., Borsting, C., Tomas, C., Pereira, V., and Morling, N. (2015). Population and forensic data for three sets of forensic genetic markers in four ethnic groups from Iran: Persians, Lurs, Kurds and Azeris. Forensic Sci Int Genet 17, 43-46. doi: 10.1016/j.fsigen.2015.03.010.
131	Uruguay	Uruguayan	Saiz, M., Andre, F., Pisano, N., Sandberg, N., Bertoni, B., and Pagano, S. (2014). Allelic frequencies and statistical data from 30 INDEL loci in Uruguayan population. Forensic Sci Int Genet 9, e27-29. doi: 10.1016/j.fsigen.2013.07.013.
519	Brasil	Brazilian	Ferreira Palha, T.J.B., Ribeiro Rodrigues, E.M., Cavalcante, G.C., Marrero, A., de Souza, I.R., Seki Uehara, C.J., et al. (2015). Population genetic analysis of insertion-deletion polymorphisms in a Brazilian population using the Investigator DIPplex kit. Forensic Sci Int Genet 19, 10-14. doi: 10.1016/j.fsigen.2015.03.015.
207	Portugal	Brazilian immigrant	Reis, F., Vieira da Silva, C., Amorim, A., Bogas, V., Ribeiro, T., Porto, M.J., et al. (2017). Genetic characterization of the Brazilian immigrant population in Lisboa with InDel genetic markers (P). Forensic Science International: Genetics Supplement Series 6, e327-e328. doi: 10.1016/j.fsigss.2017.09.123.

## Sheet: Dataset 2
Table S1B ：Population sample information from the second dataset of 47 worldwide reference populations about population size, geographical positions and Reference.
Sample Size	Region	Population	Reference
140	Nigeria	Nigerian	Du, W., Peng, Z., Feng, C., Zhu, B., Wang, B., Yue, W., et al. (2017). Forensic efficiency and genetic variation of 30 InDels in Vietnamese and Nigerian populations. Oncotarget 8(51), 88934-88940.
60	Spain	Basque	Martin, P., Garcia, O., Heinrichs, B., Yurrebaso, I., Aguirre, A., and Alonso, A. (2013). Population genetic data of 30 autosomal indels in Central Spain and the Basque Country populations. Forensic Sci Int Genet 7(2), e27-30. doi: 10.1016/j.fsigen.2012.10.003.
71	Central-Spain	Central-Spanish
80	Denmark	Dane	Friis, S.L., Borsting, C., Rockenbauer, E., Poulsen, L., Fredslund, S.F., Tomas, C., et al. (2012). Typing of 30 insertion/deletions in Danes using the first commercial indel kit--Mentype(R) DIPplex. Forensic Sci Int Genet 6(2), e72-74. doi: 10.1016/j.fsigen.2011.08.002.
56	Center-Mexico	Veracruz-Center-Mexican	Martinez-Cortes, G., Garcia-Aceves, M., Favela-Mendoza, A.F., Munoz-Valle, J.F., Velarde-Felix, J.S., and Rangel-Villalobos, H. (2016). Forensic parameters of the Investigator DIPplex kit (Qiagen) in six Mexican populations. Int J Legal Med 130(3), 683-685. doi: 10.1007/s00414-015-1242-y.
90	West-Mexico	Amerindian-West-Mexico
50	West-Mexico	Jalisco-West-Mexican
82	North-Mexico	Chihuahua-North-Mexican
67	Center-Mexico	Mexico-Center-Mexican
76	Southeast-Mexico	Yucatan-Southeast-Mexican
131	Uruguay	Uruguayan	Saiz, M., Andre, F., Pisano, N., Sandberg, N., Bertoni, B., and Pagano, S. (2014). Allelic frequencies and statistical data from 30 INDEL loci in Uruguayan population. Forensic Sci Int Genet 9, e27-29. doi: 10.1016/j.fsigen.2013.07.013.
97	Beijing	Beijing-Han	Wei, Y.L., Qin, C.J., Dong, H., Jia, J., and Li, C.X. (2014). A validation study of a multiplex INDEL assay for forensic use in four Chinese populations. Forensic Sci Int Genet 9, e22-25. doi: 10.1016/j.fsigen.2013.09.002.
96	Ili Kazakh Autonomous Prefecture	Xinjiang-Kazakh1
94	Lhasa-Tibet	Lhasa-Tibetan1
50	Sanjiang Dong Autonomous County, Liuzhou City, Guangxi Zhuang Autonomous Region	Guangxi-Dong	Wang, L., Lv, M., Zaumsegel, D., Zhang, L., Liu, F., Xiang, J., et al. (2016). A comparative study of insertion/deletion polymorphisms applied among Southwest, South and Northwest Chinese populations using Investigator((R)) DIPplex. Forensic Sci Int Genet 21, 10-14. doi: 10.1016/j.fsigen.2015.08.005
129	Chengdu	Chengdu-Han
136	Sichuan-Aba Tibetan and Qiang Autonomous Prefecture	Sichuan-Aba-Tibetan1
54	Sichuan-Liangshan	Sichuan-Yi
49	Guangxi-Liuzhou	Liuzhou-Zhuang
50	Rongshui Miao Autonomous County, Liuzhou City, Guangxi Zhuang Autonomous Region	Guangxi-Miao
123	Xinjiang Uygur Autonomous Region	Xinjiang-Uyghur1
565	Shanghai	Shanghai-Han	Wang, Z., Zhang, S., Zhao, S., Hu, Z., Sun, K., and Li, C. (2014). Population genetics of 30 insertion-deletion polymorphisms in two Chinese populations using Qiagen Investigator(R) DIPplex kit. Forensic Sci Int Genet 11, e12-14. doi: 10.1016/j.fsigen.2014.03.017.
119	Fujian	Fujian-She
487	Xinjiang	Xinjiang-Hui	Xie, T., Guo, Y., Chen, L., Fang, Y., Tai, Y., Zhou, Y., et al. (2018). A set of autosomal multiple InDel markers for forensic application and population genetic analysis in the Chinese Xinjiang Hui group. Forensic Science International: Genetics 35, 1-8. doi: 10.1016/j.fsigen.2018.03.007.
125	Yunnan-Dali	Yunnan-Bai	Yang, C.H., Yin, C.Y., Shen, C.M., Guo, Y.X., Dong, Q., Yan, J.W., et al. (2017). Genetic variation and forensic efficiency of autosomal insertion/deletion polymorphisms in Chinese Bai ethnic group: phylogenetic analysis to other populations. Oncotarget 24, 39582-39591. doi：10.18632/oncotarget.17137
122	Yunnan	Yunnan-Yi	Zhang, Y.D., Shen, C.M., Jin, R., Li, Y.N., Wang, B., Ma, L.X., et al. (2015). Forensic evaluation and population genetic study of 30 insertion/deletion polymorphisms in a Chinese Yi group. Electrophoresis 36(9-10), 1196-1201. doi: 10.1002/elps.201500003.
55	Tibet	Qamdo-Tibetan	Li, L., Ye, Y., Song, F., Wang, Z., and Hou, Y. (2019). Genetic structure and forensic parameters of 30 InDels for human identification purposes in 10 Tibetan populations of China. Forensic Sci Int Genet 40, e219-e227. doi: 10.1016/j.fsigen.2019.02.002.
55	Tibet	Xigazê-Tibetan
52	Tibet	Shannan-Tibetan
58	Tibet	Nyingchi-Tibetan
64	Tibet	Lhasa-Tibetan2
38	Tibet	Ngari-Tibetan
43	Tibet	Nagqu-Tibetan
56	Sichuan	Sichuan-Garzê-Tibetan
50	Yunnan	Yunnan-Diqing-Tibetan
123	Tibet	Tibet-Tibetan	Guo, Y., Shen, C., Meng, H., Dong, Q., Kong, T., Yang, C., et al. (2016). Population Differentiations and Phylogenetic Analysis of Tibet and Qinghai Tibetan Groups Based on 30 InDel Loci. DNA Cell Biol 35(12), 787-794. doi: 10.1089/dna.2016.3395.
122	Qinghai	Qinghai-Tibetan
139	Gansu	Gansu-Yugur	Yang, C.H., Jin, X.Y., Guo, Y.X., Cui, W., Chen, C., Meng, H.T., et al. (2019). Genetic distribution analyses and population background explorations of Gansu Yugur and Guizhou Miao groups via InDel markers. J Hum Genet 64(6), 535-543. doi: 10.1038/s10038-019-0595-3.
274	Guizhou	Guizhou-Miao
403	Zunyi	Zunyi-Miao	Chen, P., Luo, L., Gao, H., Wu, J., Wang, Y., He, G., et al. (2019). Forensic performance of 30 InDels included in the Investigator DIPplex system in Miao population and comprehensive genetic relationship in China. Int J Legal Med 133(5), 1389-1392. doi: 10.1007/s00414-019-02057-6.
200	Guangxi	Guangxi-Zhuang	Du, W., Feng, C., Yao, T., Xiao, C., Huang, H., Wu, W., et al. (2019). Genetic variation and forensic efficiency of 30 indels for three ethnic groups in Guangxi: relationships with other populations. PeerJ 7, e6861. doi: 10.7717/peerj.6861.
162	Guangxi	Guangxi-Yao
152	Guangxi	Guangxi-Kelao
205	Guizhou-Guiyang	Guizhou-Bouyei	He, G., Ren, Z., Guo, J., Zhang, F., Zou, X., Zhang, H., et al. (2019). Population genetics, diversity and forensic characteristics of Tai-Kadai-speaking Bouyei revealed by insertion/deletions markers. Mol Genet Genomics. doi: 10.1007/s00438-019-01584-6.
502	Zunyi	Zunyi-Gelao	He, G., Wang, Z., Zou, X., Wang, M., Liu, J., Wang, S., et al. (2019b). Tai-Kadai-speaking Gelao population: Forensic features, genetic diversity and population structure. Forensic Sci Int Genet 40, e231-e239. doi: 10.1016/j.fsigen.2019.03.013.
236	Enshi Tujia and Miao Autonomous Prefecture, Hubei Province	Hubei-Tujia	Shen, C., Zhu, B., Yao, T., Li, Z., Zhang, Y., Yan, J., et al. (2016). A 30-InDel Assay for Genetic Variation and Population Structure Analysis of Chinese Tujia Group. Sci Rep 6, 36842. doi: 10.1038/srep36842.
373	South-Korea	South-Korean	Seong, K.M., Park, J.H., Hyun, Y.S., Kang, P.W., Choi, D.H., Han, M.S., et al. (2014). Population genetics of insertion-deletion polymorphisms in South Koreans using Investigator DIPplex kit. Forensic Sci Int Genet 8(1), 80-83. doi: 10.1016/j.fsigen.2013.06.013.
