# Supplementary material for: Forensic Features and Population Genetic Structure of Dong, Yi, Han, and Chuanqing Human Populations in Southwest China Inferred From Insertion/Deletion Markers
Source: Front Genet. 2020 Apr 30;11:360. doi: 10.3389/fgene.2020.00360 (PMC7205039; doi:10.3389/fgene.2020.00360)
Supplement: TABLE S3 — The p-values of Linkage Disequilibrium for Guizhou Dong, Yi, Han, Chuanqing among 30 Indels detected in the Investigator DIPplex amplification system. [file Table_3.xlsx]

## Sheet: Sheet4
Supplementary Table S3. The p values of Linkage Disequilibrium of the four groups(Dong,Yi,Han,Chuanqing) among 30 Indels detected in the Investigator DIPplex amplification system.
a-Dong
Loci	HLD101	HLD111	HLD114	HLD118	HLD122	HLD124	HLD125	HLD128	HLD131	HLD133	HLD136	HLD39	HLD40	HLD45	HLD48	HLD56	HLD58	HLD6	HLD64	HLD67	HLD70	HLD77	HLD81	HLD83	HLD84	HLD88	HLD92	HLD93	HLD97	HLD99
HLD101
HLD111	0.88409
HLD114	0.78627	0.01208
HLD118	0.15162	0.95061	0.63197
HLD122	0.5481	0.03415	0.34714	0.13412
HLD124	0.29648	0.59652	0.0117	0.67964	0.69194
HLD125	0.91152	0.37592	0.70417	0.49052	0.62143	0.82471
HLD128	0.18485	0.59691	0.72055	0.35543	0.74546	0.07307	0.46801
HLD131	0.53808	0.075	0.63647	0.74195	0.05954	0.63303	0.01176	0.24901
HLD133	0.44992	0.09128	0.76664	0.49674	0.75685	0.65479	0.70881	0.00303	0.58186
HLD136	0.46024	0.57966	0.98474	0.15422	0.1856	0.30849	0.88566	0.96158	0.47877	0.12239
HLD39	0.93324	0.1695	0.07447	0.83902	0.46449	0.17666	0.04428	0.739	0.71402	0.66826	0.77305
HLD40	0.24076	0.42836	0.47282	0.21275	0.34477	0.23748	0.68177	0.47047	0.82002	0.67343	0.53035	0.47295
HLD45	0.33412	0.10991	0.04228	0.33833	0.62353	0.6227	0.49539	0.7062	0.77779	0.88663	0.73163	0.65762	0.64119
HLD48	0.52891	0.04809	0.27428	0.73919	0.20146	0.62085	0.83693	0.11173	0.71419	0.23328	0.26448	0.00736	0.95473	0.7497
HLD56	0.03482	0.93736	0.17017	0.97933	0.08257	0.91915	0.48372	0.40437	0.5407	0.72683	0.46801	0.03498	0.31088	0.71844	0.6526
HLD58	0.60687	0.23611	0.44088	0.1563	0.06058	0.70974	0.79835	0.28518	0.04712	0.56415	0.89625	0.25703	0.75483	0.64743	0.97702	0.20426
HLD6	0.80218	0.89733	0.81216	0.8355	0.52488	0.98209	0.66114	0.70095	0.54242	0.12472	0.8066	0.74968	0.58311	0.26749	0.76702	0.82447	0.85204
HLD64	0.05614	0.64625	0.02071	0.16664	0.65318	0.1984	0.0948	0.82932	0.26335	0.43561	0.72209	1	0.57885	0.1209	0.7704	0.58629	0.35087	0.27611
HLD67	0.77603	0.55479	0.9693	0.83732	0.06034	0.8249	0.36952	0.43854	0.89944	0.61472	0.51322	0.07327	0.8279	0.56604	0.87954	0.24484	0.33915	0.17222	0.0856
HLD70	0.2224	0.36166	0.43437	0.52651	0.08643	0.17844	0.09219	0.61825	0.41195	0.33775	0.12733	0.69871	0.05831	0.47368	0.82179	0.42004	0.97432	0.56896	0.33858	0.28313
HLD77	0.42104	0.15402	0.38846	0.94419	0.6275	0.10019	0.653	0.96756	0.71293	0.97863	0.83429	0.47919	0.87484	0.09739	0.33259	0.68599	0.78483	0.0884	0.01004	0.9199	0.60919
HLD81	0.42931	0.5269	0.28982	0.57476	0.14239	0.73332	0.84545	0.82748	0.36778	0.82446	0.03702	0.20527	0.89594	0.30982	0.81103	0.58667	0.12953	0.72964	0.56316	0.16807	0.32122	0.0505
HLD83	0.41684	0.49843	0.37695	0.2779	0.81604	0.1439	0.9061	0.94965	0.04565	0.26036	0.69082	0.50071	0.16119	0.67494	0.19685	0.7833	0.05097	0.31558	0.13181	0.15483	0.2714	0.94134	0.20261
HLD84	0.02521	0.5	0.80501	0.72411	0.44465	0.45295	0.67104	0.632	0.02382	0.94813	0.67107	0.59276	0.56446	0.27343	0.78077	0.82513	0.23327	0.38845	0.0243	0.17538	0.17935	0.87437	0.96852	0.33199
HLD88	0.44996	0.97427	0.90513	0.76612	0.70628	0.49354	0.86928	0.82844	0.79862	0.75917	0.99654	0.07182	0.9724	0.95749	0.68263	0.47152	0.54468	0.16404	0.62947	0.82202	0.05553	0.71175	0.10977	0.11429	0.14074
HLD92	0.72746	0.03433	0.07791	0.39198	0.27725	0.79692	0.53504	0.86947	0.36252	0.92553	0.84676	0.39358	0.39788	0.36456	0.17629	0.81398	0.15813	0.54124	0.94283	0.62742	0.30632	0.95487	0.79192	0.71945	0.03386	0.35485
HLD93	0.90676	0.04123	0.64021	0.9098	0.09722	0.60915	0.74941	0.52452	0.30014	0.79671	0.87518	0.98283	0.806	0.14723	0.32158	0.26565	0.28079	0.59468	0.65615	0.0806	0.72837	0.42282	0.61577	0.44664	0.88885	0.65245	0.47342
HLD97	0.1824	0.91474	0.55743	0.93459	0.42533	0.55499	0.87703	0.71487	0.29212	0.05705	0.67948	0.8142	0.06903	0.47748	0.55626	0.16576	0.32627	0.25138	0.51989	0.33813	0.94312	0.78879	0.22906	0.19633	0.4298	0.59052	0.83368	0.89399
HLD99	0.40593	0.12139	0.71136	0.82649	0.22479	0.55165	0.87829	0.30585	0.53832	0.5729	0.95139	0.91137	0.71662	0.48733	0.88516	0.1038	0.95414	0.8319	0.92042	0.01179	0.0272	0.17211	0.01374	0.6024	0.20935	0.54608	0.07251	0.37475	0.8652
b-Yi
Loci	HLD101	HLD111	HLD114	HLD118	HLD122	HLD124	HLD125	HLD128	HLD131	HLD133	HLD136	HLD39	HLD40	HLD45	HLD48	HLD56	HLD58	HLD6	HLD64	HLD67	HLD70	HLD77	HLD81	HLD83	HLD84	HLD88	HLD92	HLD93	HLD97	HLD99
HLD101
HLD111	0.2223
HLD114	0.93194	0.64258
HLD118	0.47794	0.09702	0.22589
HLD122	0.55082	0.04149	0.76675	0.34928
HLD124	0.049	0.93264	0.60989	0.66191	0.89212
HLD125	0.92411	0.01356	0.62376	0.86415	0.0113	0.22233
HLD128	0.50161	0.14953	0.26378	0.69043	0.11306	0.40147	0.67805
HLD131	0.2149	0.41131	0.62691	0.88767	0.07904	0.64954	0.33658	0.93995
HLD133	0.10645	0.12876	0.34497	0.11641	0.67902	0.04041	0.60481	0.64257	0.71976
HLD136	0.44289	0.25191	0.84505	0.71323	0.60933	0.74094	0.41641	0.6471	0.46286	0.1879
HLD39	0.96083	0.08522	0.03667	0.67126	0.23445	0.48854	0.92855	0.542	0.97033	0.1726	0.80295
HLD40	0.83767	0.09227	0.11652	0.58891	0.19722	0.16772	0.29514	0.80859	0.71074	0.81266	0.58704	0.08193
HLD45	0.54209	0.43293	0.88762	0.99605	0.9083	0.34835	0.17508	0.57914	0.65757	0.59682	0.38636	0.83543	0.5508
HLD48	0.69703	0.16245	0.18075	0.29681	0.55324	0.37696	0.03542	0.32163	0.92551	0.22143	0.21082	0.78818	0.58157	0.87344
HLD56	0.18715	0.98019	0.20408	0.39485	0.44719	0.59073	0.8324	0.08126	0.17221	0.22977	0.00218	0.16067	0.12308	0.46259	0.37268
HLD58	0.99262	0.69647	0.61885	0.38211	0.14455	0.35606	0.08967	0.4781	0.28137	0.34094	0.12766	0.85894	0.57657	0.68124	0.53699	0.53608
HLD6	0.88578	0.46721	0.09398	0.7456	0.26941	0.62291	0.91827	0.86826	0.43722	0.748	0.17491	0.04704	0.42434	0.21797	0.76875	0.25901	0.4432
HLD64	0.22629	0.04459	0.9527	0.10262	0.97331	0.92298	0.73713	0.79225	0.84532	0.05998	0.66898	0.08169	0.37361	0.68781	0.35652	0.65384	0.93733	0.30462
HLD67	0.56859	0.81945	0.09895	0.18676	0.59232	0.99197	0.56473	0.5309	0.07818	0.1526	0.26031	0.69209	0.09895	0.81149	0.39093	0.12154	0.19117	0.4255	0.51291
HLD70	0.44154	0.34773	0.02464	0.54707	0.79612	0.86319	0.39467	0.33418	0.60609	0.30128	0.9125	0.01187	0.04025	0.14306	0.68537	0.36275	0.0369	0.83418	0.19987	0.49138
HLD77	0.77669	0.03798	0.85277	0.79729	0.47226	0.57366	0.77833	0.43395	0.89704	0.75118	0.87476	0.66293	0.94144	0.37264	0.96492	0.03091	0.8996	0.75079	0.05826	0.66024	0.98785
HLD81	0.6532	0.64451	0.4291	0.06232	0.04501	0.37323	0.3397	0.04601	0.49449	0.10409	0.64051	0.49231	0.29447	0.02112	0.71473	0.59526	0.64609	0.8097	0.61628	0.66437	0.65591	0.53249
HLD83	0.23545	0.96032	0.817	0.5757	0.91396	0.93748	0.58773	0.11371	0.94358	0.52051	0.11812	0.86875	0.91853	0.97567	0.29779	0.75644	0.2702	0.59996	0.63114	0.45908	0.05938	0.30291	0.08782
HLD84	0.61357	0.89561	0.48751	0.89537	0.70645	0.01069	0.57869	0.10988	0.09127	0.31009	0.96241	0.62261	0.06916	0.66413	0.08374	0.86734	0.98146	0.79611	0.47566	0.02169	0.31674	0.21957	0.7726	0.62447
HLD88	0.95237	0.22267	0.97613	0.21832	0.42581	0.14337	0.12303	0.18239	0.4195	0.93016	0.96794	0.41368	0.66559	0.68032	0.00418	0.25173	0.14755	0.21927	0.06873	0.61911	0.35262	0.22329	0.68299	0.6674	0.11811
HLD92	0.14657	0.49088	0.16785	0.59809	0.07795	0.12666	0.56104	0.85861	0.78593	0.08715	0.28499	0.026	0.14201	0.69998	0.28246	0.08394	0.32334	0.5845	0.93357	0.09055	0.8942	0.24993	0.70225	0.21174	0.05998	0.63079
HLD93	0.5349	0.41796	0.32132	0.52021	0.01986	0.61716	0.51255	0.27334	0.23063	0.60166	0.21082	0.35295	0.86652	0.17773	0.4601	0.54329	0.56228	0.96187	0.21331	0.02778	0.95649	0.63467	0.01675	0.96612	0.32103	0.55477	0.04482
HLD97	0.5343	0.6953	0.03906	0.4361	0.86119	0.77171	0.59513	0.40308	0.97502	0.50291	0.03247	0.65176	0.23377	0.77199	0.57067	0.03009	0.02625	0.05905	0.73872	0.24965	0.12264	0.86666	0.14274	0.00645	0.52411	0.83803	0.41968	0.52617
HLD99	0.89409	0.67712	0.29356	0.66419	0.06798	0.65651	0.49502	0.3847	0.84179	0.82939	0.07265	0.06507	0.46423	0.96224	0.70458	0.5402	0.50009	0.30563	0.30526	0.03802	0.24073	0.3911	0.27938	0.71224	0.02448	0.37435	0.42227	0.33723	0.75608
c-Han
Loci	HLD101	HLD111	HLD114	HLD118	HLD122	HLD124	HLD125	HLD128	HLD131	HLD133	HLD136	HLD39	HLD40	HLD45	HLD48	HLD56	HLD58	HLD6	HLD64	HLD67	HLD70	HLD77	HLD81	HLD83	HLD84	HLD88	HLD92	HLD93	HLD97	HLD99
HLD101
HLD111	0.92153
HLD114	0.21129	0.92711
HLD118	0.16889	0.27937	0.96374
HLD122	0.27793	0.47581	0.73618	0.51344
HLD124	0.06347	0.7395	0.20156	0.24638	0.88773
HLD125	0.8745	0.22476	0.22121	0.85618	0.5162	0.73941
HLD128	0.29019	0.47132	0.58839	0.6595	0.46959	0.01139	0.83645
HLD131	0.87515	0.15022	0.51522	0.47447	0.20281	0.9046	0.07961	0.98767
HLD133	0.12662	0.93143	0.24423	0.46301	0.30932	0.44221	0.45565	0.58412	0.30899
HLD136	0.16376	0.45167	0.09902	0.12858	0.57704	0.64193	0.35057	0.87737	1	0.16697
HLD39	0.88727	0.33307	0.20426	0.32513	0.05264	0.64861	0.55396	0.68502	0.13055	0.24305	0.03223
HLD40	0.03478	0.12368	0.19704	0.32599	0.00428	0.73607	0.64556	0.34951	0.91118	0.77618	0.3418	0.8311
HLD45	0.74331	0.85537	0.28877	0.1814	0.75325	0.49751	0.20664	0.81089	0.99055	0.79478	0.02056	0.47329	0.94533
HLD48	0.60801	0.2018	0.32708	0.2605	0.92714	0.2585	0.94677	0.89764	0.33667	0.05262	0.77089	0.06277	0.61017	0.27004
HLD56	0.86462	0.71165	0.50786	0.85744	0.88728	0.4137	0.7727	0.46529	0.01266	0.17933	0.1914	0.24349	0.41709	0.98288	0.61575
HLD58	0.13369	0.51293	0.46658	0.26676	0.71434	0.2167	0.17012	0.8005	0.19061	0.25659	0.00276	0.60645	0.94544	0.13173	0.62656	0.86445
HLD6	0.30392	0.55947	0.37057	0.16895	0.46886	0.31849	0.33144	0.49193	0.92602	0.31855	0.0733	0.16785	0.1513	0.84178	0.52093	0.93451	0.30396
HLD64	0.43526	0.89322	0.41785	0.48073	0.97686	0.28625	0.57179	0.24413	0.52001	0.99922	0.42069	0.06143	0.12838	0.00366	0.06413	0.20166	0.95098	0.48471
HLD67	0.48975	0.11659	0.2781	0.25109	0.56228	0.20202	0.80175	0.13317	0.51475	0.57986	1	0.59594	0.96153	0.09637	0.12947	0.96823	0.72627	0.27418	0.70744
HLD70	0.51438	0.97264	0.70482	0.59396	0.97957	0.43247	0.62503	0.02503	0.16824	0.01471	0.19873	0.42074	0.19408	0.04136	0.41293	0.138	0.42655	0.94304	0.63943	0.3318
HLD77	0.94788	0.07695	0.5621	0.7757	0.68096	0.3984	0.93992	0.11295	0.17613	0.97288	0.59316	1	0.34813	0.65567	0.89961	0.75753	0.71624	0.02333	0.66274	0.02775	0.33294
HLD81	0.16937	0.6601	0.70087	0.77495	0.18803	0.1851	0.6372	0.66525	0.14231	0.85442	0.63066	0.56162	0.23923	0.32561	0.47201	0.75165	0.63233	0.40995	0.26148	0.54208	0.31793	0.61856
HLD83	0.9289	0.03859	0.10422	0.39697	0.98006	0.65436	0.77385	0.96171	0.70019	0.4614	0.18272	0.71099	0.64724	0.28304	0.45209	0.80977	0.21424	0.1815	0.38297	0.73649	0.80437	0.66487	0.06893
HLD84	0.9514	0.40108	0.1347	0.50414	0.68904	0.67909	0.41668	0.40194	0.48919	0.87381	0.43443	0.44018	0.6583	0.94538	0.63903	0.49442	0.75217	0.31374	0.1962	0.23784	0.20389	0.72035	0.50938	0.62028
HLD88	0.97267	0.9662	0.75434	0.17633	0.70519	0.42259	0.78713	0.54586	0.10073	0.73335	0.60192	0.75633	0.45933	0.13858	0.7477	0.29373	0.47934	0.60451	0.90032	0.0119	0.57408	0.00514	0.09451	0.32	0.48288
HLD92	0.44523	0.93209	0.60827	0.04101	0.17572	0.49635	0.64104	0.49843	0.03332	0.91222	0.36185	0.4612	0.63908	0.86309	0.92295	0.71074	0.85681	0.91037	0.61669	0.56608	0.35045	0.89113	0.72209	0.19349	0.13305	0.05558
HLD93	0.91735	0.75323	0.73692	0.38369	0.32891	0.61263	0.55844	0.32872	0.66742	0.94312	0.04128	0.62675	0.58216	0.3508	0.13209	0.55909	0.54064	0.38883	0.61051	0.06068	0.36211	0.26314	0.54206	0.4298	0.13311	0.84474	0.71367
HLD97	0.56494	0.35384	0.4068	0.65686	0.47312	0.77434	0.50374	0.51516	0.12515	0.07167	0.77967	0.04274	0.50615	0.27456	0.21119	0.66474	0.77638	0.63841	0.81903	0.84756	0.15129	0.16305	0.86093	0.07693	0.0339	0.15153	0.31471	0.73014
HLD99	0.25283	0.73156	0.1577	0.77579	0.5065	0.94043	0.17562	0.50401	0.83575	0.18178	0.51714	0.93795	0.99123	0.65775	0.92903	0.02752	0.7087	0.17579	0.1045	0.90997	0.92289	0.5642	0.22694	0.83075	0.62072	0.66529	0.54567	0.67251	0.29359
d-Chuanqing
Loci	HLD101	HLD111	HLD114	HLD118	HLD122	HLD124	HLD125	HLD128	HLD131	HLD133	HLD136	HLD39	HLD40	HLD45	HLD48	HLD56	HLD58	HLD6	HLD64	HLD67	HLD70	HLD77	HLD81	HLD83	HLD84	HLD88	HLD92	HLD93	HLD97	HLD99
HLD101
HLD111	0.87079
HLD114	0.21947	0.21441
HLD118	1	0.35982	0.65974
HLD122	0.83363	0.37522	0.00349	0.86723
HLD124	0.81296	0.11639	0.25709	0.51772	0.69495
HLD125	0.1391	0.72511	0.35809	0.63786	0.14848	0.00832
HLD128	0.11355	0.34664	0.87726	0.76483	0.09374	0.77069	0.03524
HLD131	0.60085	0.36329	0.78577	1	0.16459	0.19164	0.01339	0.37269
HLD133	0.45264	0.13947	0.51141	0.59341	0.15905	0.66686	0.57955	0.45334	0.69036
HLD136	0.86271	0.79234	0.15764	0.76393	0.01551	0.34368	0.46786	0.92283	0.13801	0.88342
HLD39	0.16974	0.11887	0.0627	0.20339	0.94152	0.80066	0.99707	0.27399	0.15041	0.27814	0.2969
HLD40	0.58575	0.50739	0.32243	0.70601	0.66066	0.3771	0.8368	0.32687	0.91794	0.5107	0.66768	0.85241
HLD45	0.01479	0.80704	0.84995	0.52162	0.72577	0.93291	0.14657	0.4515	0.15192	0.74264	0.76876	0.75735	0.39803
HLD48	0.82696	0.22846	0.45724	0.58066	0.31704	0.08159	0.33121	0.32408	0.94985	0.27392	0.30638	0.16552	0.60692	0.8996
HLD56	0.75596	0.65756	0.01681	0.78334	0.29099	0.72113	0.80201	0.05905	0.92825	0.01692	0.39174	0.74734	0.9309	0.80781	0.12405
HLD58	0.37521	0.21631	0.38523	0.60297	0.64218	0.59534	0.46254	0.63593	0.41843	0.09162	0.99418	0.37724	0.80365	0.16086	0.92448	0.86817
HLD6	0.59618	0.04916	0.12058	0.60946	0.86076	0.38606	0.9495	0.97277	0.12347	0.26499	0.39618	0.519	0.51518	0.06695	0.3524	0.36264	0.3858
HLD64	0.45917	0.21346	0.99422	0.83343	0.87715	0.22846	0.44969	0.7375	0.08214	0.4215	0.30874	0.45517	0.65737	0.94264	0.9878	0.8176	0.34913	0.24829
HLD67	0.02159	0.67598	0.30002	0.13627	0.69112	0.63017	0.93669	0.00894	0.00993	0.81751	0.64854	0.13907	0.67573	0.82888	0.53881	0.33651	0.68847	0.55955	0.06754
HLD70	0.37735	0.04296	0.56705	0.13789	0.82695	0.78436	0.99156	0.26265	0.57376	0.63567	0.4511	0.91375	0.09806	0.05026	0.49025	0.88403	0.3726	0.14283	0.04504	0.53408
HLD77	0.21568	0.14659	0.85372	0.60036	0.96481	0.05578	0.22006	0.84614	0.36767	0.74337	0.68899	0.77207	0.24961	0.51832	0.18437	0.5303	0.00345	0.16582	0.21058	0.47939	0.80219
HLD81	0.74793	0.64307	0.88789	0.82141	0.27924	0.19043	0.88871	0.56419	0.05026	0.51008	0.07094	0.25466	0.95315	0.62754	0.39788	0.16078	0.84735	0.13031	0.35634	0.10402	0.00875	0.83425
HLD83	0.71497	0.27701	0.44085	0.32452	0.83134	0.05173	0.3016	0.3033	0.42433	0.72267	0.73921	0.06694	0.74982	0.904	0.81317	0.47626	0.54673	0.57913	0.56074	0.56905	0.09674	0.33718	0.3503
HLD84	0.41125	0.79462	0.66636	0.65881	0.12923	0.02475	0.94129	0.77341	0.54941	0.20878	0.10335	0.30119	0.89236	0.74821	0.1212	0.19656	0.33977	0.11216	0.06341	0.37526	0.43716	0.93023	0.16315	0.12402
HLD88	0.72733	0.83949	0.77143	0.97745	0.2566	0.71992	0.56633	0.37531	0.59158	0.00362	0.50691	0.41135	0.76788	0.2997	0.32451	0.11099	0.09479	0.12378	0.28404	0.28045	0.42	0.14151	0.53158	0.35946	0.50348
HLD92	0.07952	0.73324	0.20757	0.47788	0.19797	0.80719	0.67593	0.17028	0.08217	0.95939	0.97834	0.48899	0.76456	0.17449	0.10101	0.19287	0.65398	0.45171	0.48978	0.52588	0.71582	0.41231	0.23611	0.87225	0.08308	0.31245
HLD93	0.38499	0.02627	0.15643	0.81939	0.17911	0.07062	0.76591	0.52561	0.8364	0.81563	0.34533	0.58251	0.78382	0.50047	0.41222	0.53581	0.02795	0.80556	0.79408	0.37434	0.29252	0.13475	0.12625	0.8074	0.86216	0.18061	0.12604
HLD97	0.31696	0.65114	0.61982	0.32856	0.19928	0.03147	0.17944	0.69996	0.12364	0.32612	0.3538	0.81583	0.61735	0.50275	0.44635	0.67653	0.65005	0.00728	0.0328	0.64618	0.25012	0.77501	0.21665	0.42727	0.76915	0.51152	0.67417	0.98144
HLD99	0.29646	0.27027	0.56899	0.83919	0.57166	0.89197	0.44161	0.25157	0.83408	0.83189	0.12903	0.46195	0.2449	0.2656	0.59317	0.43463	0.02967	0.47897	0.91796	0.32106	0.70478	0.70025	0.59114	0.40174	0.58978	0.22263	0.55093	0.64233	0.98799
