# Supplementary material for: Forensic Features and Population Genetic Structure of Dong, Yi, Han, and Chuanqing Human Populations in Southwest China Inferred From Insertion/Deletion Markers
Source: Front Genet. 2020 Apr 30;11:360. doi: 10.3389/fgene.2020.00360 (PMC7205039; doi:10.3389/fgene.2020.00360)
Supplement: TABLE S4 — Allele frequencies and forensic parameters for the 30 Indels in Dong, Yi, Han, and Chuanqing groups of Guizhou. [file Table_4.xlsx]

## Sheet: Sheet1
Supplementary Table S4. Allele frequencies and forensic parameters for the 30 Indels in Dong,Yi,Han and Chuanqing groups of Guizhou
a-Dong(n=148)
Loci	Insertion	Deletion	Ho	He	PM	PD	PE	PIC	TPI	HWE
HLD101	0.532	0.468	0.50676	0.49892	0.3812	0.6188	0.1935	0.3736	1.0137	0.87093
HLD111	0.129	0.871	0.18919	0.21438	0.6508	0.3492	0.0269	0.1908	0.6167	0.2327
HLD114	0.169	0.831	0.29054	0.28619	0.5509	0.4491	0.0597	0.2445	0.7048	1
HLD118	0.944	0.056	0.11486	0.10863	0.7967	0.2033	0.0108	0.1024	0.5649	1
HLD122	0.177	0.823	0.31081	0.29931	0.5358	0.4642	0.0681	0.2538	0.7255	0.7845
HLD124	0.589	0.411	0.47297	0.48374	0.3805	0.6195	0.1649	0.3659	0.9487	0.8642
HLD125	0.468	0.532	0.47297	0.49427	0.37	0.63	0.1649	0.3713	0.9487	0.61893
HLD128	0.331	0.669	0.46622	0.45531	0.406	0.594	0.1596	0.3508	0.9367	0.85721
HLD131	0.379	0.621	0.39189	0.43976	0.4002	0.5998	0.1091	0.3422	0.8222	0.1928
HLD133	0.379	0.621	0.51351	0.46505	0.4186	0.5814	0.1996	0.3561	1.0278	0.21414
HLD136	0.516	0.484	0.49324	0.49984	0.3735	0.6265	0.1817	0.3741	0.9867	1
HLD39	0.097	0.903	0.18919	0.1935	0.6717	0.3283	0.0269	0.1742	0.6167	0.67635
HLD40	0.685	0.315	0.38514	0.46686	0.3721	0.6279	0.1051	0.357	0.8132	0.03585
HLD45	0.71	0.29	0.42568	0.4467	0.4009	0.5991	0.1303	0.3461	0.8706	0.58373
HLD48	0.339	0.661	0.4527	0.45934	0.3969	0.6031	0.1494	0.353	0.9136	0.85889
HLD56	0.524	0.476	0.47297	0.49427	0.37	0.63	0.1649	0.3713	0.9487	0.61929
HLD58	0.492	0.508	0.54054	0.50133	0.3981	0.6019	0.2255	0.3748	1.0882	0.40941
HLD6	0.46	0.54	0.48649	0.50087	0.3693	0.6307	0.1759	0.3746	0.9737	0.74236
HLD64	0.903	0.097	0.20946	0.21949	0.6376	0.3624	0.0324	0.1948	0.6325	0.70113
HLD67	0.726	0.274	0.34459	0.37286	0.4619	0.5381	0.0836	0.3026	0.7629	0.38076
HLD70	0.653	0.347	0.35811	0.48243	0.3535	0.6465	0.0904	0.3652	0.7789	0.00225
HLD77	0.468	0.532	0.52027	0.49343	0.394	0.606	0.2059	0.3708	1.0423	0.61737
HLD81	0.726	0.274	0.29054	0.37286	0.4645	0.5355	0.0597	0.3026	0.7048	0.01307
HLD83	0.427	0.573	0.50676	0.49892	0.3812	0.6188	0.1935	0.3736	1.0137	0.86927
HLD84	0.855	0.145	0.26351	0.27721	0.5644	0.4356	0.0496	0.2381	0.6789	0.55304
HLD88	0.532	0.468	0.55405	0.49583	0.4123	0.5877	0.2393	0.3721	1.1212	0.1849
HLD92	0.468	0.532	0.50676	0.49782	0.3823	0.6177	0.1935	0.3731	1.0137	0.86854
HLD93	0.653	0.347	0.48649	0.47824	0.3919	0.6081	0.1759	0.363	0.9737	0.86398
HLD97	0.331	0.669	0.42568	0.42197	0.4256	0.5744	0.1303	0.3321	0.8706	1
HLD99	0.887	0.113	0.16892	0.17735	0.6971	0.3029	0.0219	0.1611	0.6016	0.63085
CDP=0.9999999999660890
CPE=0.9841
b-Yi(n=152)
Loci	Insertion	Deletion	Ho	He	PM	PD	PE	PIC	TPI	HWE
HLD101	0.447368	0.552632	0.55263	0.49609	0.411	0.589	0.2378	0.3722	1.1176	0.19112
HLD111	0.0493421	0.950658	0.09868	0.09412	0.8221	0.1779	0.0082	0.0894	0.5547	1
HLD114	0.236842	0.763158	0.38158	0.36269	0.4753	0.5247	0.1031	0.2962	0.8085	0.65392
HLD118	0.914474	0.0855263	0.17105	0.15694	0.7164	0.2836	0.0224	0.1442	0.6032	0.60297
HLD122	0.164474	0.835526	0.25	0.27575	0.5689	0.4311	0.0449	0.2371	0.6667	0.24459
HLD124	0.526316	0.473684	0.48684	0.50026	0.3701	0.6299	0.1762	0.3743	0.9744	0.74851
HLD125	0.453947	0.546053	0.51316	0.49739	0.3861	0.6139	0.1993	0.3729	1.027	0.74311
HLD128	0.213816	0.786184	0.36184	0.33731	0.4984	0.5016	0.0923	0.2797	0.7835	0.46969
HLD131	0.335526	0.664474	0.39474	0.44737	0.3931	0.6069	0.1108	0.3465	0.8261	0.14938
HLD133	0.381579	0.618421	0.44737	0.47351	0.3809	0.6191	0.1454	0.3606	0.9048	0.49867
HLD136	0.4375	0.5625	0.50658	0.49381	0.3862	0.6138	0.1933	0.3711	1.0133	0.86926
HLD39	0.131579	0.868421	0.25	0.22929	0.6152	0.3848	0.0449	0.2024	0.6667	0.47328
HLD40	0.631579	0.368421	0.46053	0.46691	0.3922	0.6078	0.1552	0.3571	0.9268	0.86376
HLD45	0.634868	0.365132	0.53289	0.46515	0.4294	0.5706	0.2179	0.3561	1.0704	0.08235
HLD48	0.375	0.625	0.48684	0.4703	0.3999	0.6001	0.1762	0.3589	0.9744	0.72979
HLD56	0.601974	0.398026	0.45395	0.48078	0.376	0.624	0.1503	0.3644	0.9157	0.502
HLD58	0.404605	0.595395	0.44079	0.48339	0.3689	0.6311	0.1407	0.3657	0.8941	0.31182
HLD6	0.444079	0.555921	0.51974	0.49538	0.3917	0.6083	0.2054	0.3719	1.0411	0.62514
HLD64	0.838816	0.161184	0.26974	0.2713	0.569	0.431	0.0518	0.2338	0.6847	1
HLD67	0.753289	0.246711	0.30921	0.37292	0.4625	0.5375	0.0674	0.3026	0.7238	0.04854
HLD70	0.621711	0.378289	0.49342	0.47193	0.4014	0.5986	0.1818	0.3597	0.987	0.60738
HLD77	0.417763	0.582237	0.49342	0.48808	0.3853	0.6147	0.1818	0.3681	0.987	1
HLD81	0.805921	0.194079	0.25658	0.31386	0.5293	0.4707	0.0472	0.2639	0.6726	0.03564
HLD83	0.404605	0.595395	0.42763	0.48339	0.3649	0.6351	0.1316	0.3657	0.8736	0.17816
HLD84	0.756579	0.243421	0.38158	0.36955	0.4685	0.5315	0.1031	0.3005	0.8085	0.82575
HLD88	0.519737	0.480263	0.44737	0.50087	0.3536	0.6464	0.1454	0.3746	0.9048	0.19738
HLD92	0.414474	0.585526	0.48684	0.48697	0.3833	0.6167	0.1762	0.3676	0.9744	1
HLD93	0.625	0.375	0.51316	0.4703	0.4131	0.5869	0.1993	0.3589	1.027	0.30255
HLD97	0.361842	0.638158	0.43421	0.46335	0.3868	0.6132	0.1361	0.3552	0.8837	0.48264
HLD99	0.888158	0.111842	0.19737	0.19932	0.6624	0.3376	0.029	0.1789	0.623	1
CDP=0.9999999999679420
CPE=0.9854
c-Han(n=200)
Loci	Insertion	Deletion	Ho	He	PM	PD	PE	PIC	TPI	HWE
HLD101	0.4375	0.5625	0.435	0.49342	0.35665	0.64335	0.136672	0.371063	0.884956	0.11415
HLD111	0.0875	0.9125	0.175	0.16009	0.71125	0.28875	0.0233296	0.146937	0.606061	0.37192
HLD114	0.2475	0.7525	0.325	0.37342	0.46095	0.53905	0.0743435	0.303114	0.740741	0.0876
HLD118	0.93	0.07	0.14	0.13053	0.7592	0.2408	0.0155411	0.121724	0.581395	0.6042
HLD122	0.1875	0.8125	0.315	0.30545	0.52915	0.47085	0.0698929	0.25827	0.729927	0.81703
HLD124	0.5775	0.4225	0.545	0.48921	0.41255	0.58745	0.229999	0.368922	1.0989	0.1111
HLD125	0.4025	0.5975	0.515	0.48219	0.40185	0.59815	0.200966	0.365313	1.03093	0.38044
HLD128	0.35	0.65	0.48	0.45614	0.4106	0.5894	0.170592	0.351488	0.961538	0.53407
HLD131	0.3175	0.6825	0.435	0.43447	0.41545	0.58455	0.136672	0.339475	0.884956	1
HLD133	0.3525	0.6475	0.405	0.45763	0.38455	0.61545	0.116989	0.352297	0.840336	0.11942
HLD136	0.5	0.5	0.47	0.50125	0.36135	0.63865	0.162572	0.375	0.943396	0.40192
HLD39	0.125	0.875	0.2	0.2193	0.64125	0.35875	0.02976	0.194824	0.625	0.20271
HLD40	0.66	0.34	0.51	0.44992	0.43135	0.56865	0.196401	0.348089	1.02041	0.06066
HLD45	0.6375	0.3625	0.465	0.46335	0.39715	0.60285	0.158668	0.355379	0.934579	1
HLD48	0.39	0.61	0.52	0.47699	0.4098	0.5902	0.205608	0.362607	1.04167	0.23522
HLD56	0.565	0.435	0.49	0.49278	0.3786	0.6214	0.178899	0.370739	0.980392	1
HLD58	0.3875	0.6125	0.485	0.47588	0.39315	0.60685	0.174709	0.362023	0.970874	0.8809
HLD6	0.45	0.55	0.4	0.49624	0.345	0.655	0.11392	0.372488	0.833333	0.00658
HLD64	0.8475	0.1525	0.235	0.25914	0.58935	0.41065	0.040035	0.22508	0.653595	0.17995
HLD67	0.6975	0.3025	0.405	0.42305	0.41905	0.58095	0.116989	0.332951	0.840336	0.61615
HLD70	0.6125	0.3875	0.505	0.47588	0.40285	0.59715	0.191913	0.362023	1.0101	0.45682
HLD77	0.43	0.57	0.44	0.49143	0.3602	0.6398	0.140173	0.370052	0.892857	0.15282
HLD81	0.7875	0.2125	0.325	0.33553	0.49875	0.50125	0.0743435	0.27868	0.740741	0.67673
HLD83	0.3725	0.6275	0.495	0.46866	0.40505	0.59495	0.183162	0.358215	0.990099	0.44826
HLD84	0.7875	0.2125	0.315	0.33553	0.49915	0.50085	0.0698929	0.27868	0.729927	0.4003
HLD88	0.555	0.445	0.45	0.49519	0.3598	0.6402	0.147369	0.371957	0.909091	0.20125
HLD92	0.4475	0.5525	0.465	0.49573	0.36485	0.63515	0.158668	0.372229	0.934579	0.39499
HLD93	0.555	0.445	0.5	0.49519	0.38105	0.61895	0.1875	0.371957	1	1
HLD97	0.335	0.665	0.45	0.44667	0.4082	0.5918	0.147369	0.346293	0.909091	1
HLD99	0.8825	0.1175	0.215	0.20791	0.64695	0.35305	0.0339764	0.185883	0.636943	1
CDP=0.9999999999796290
CPE=0.9855
d-Chuanqing(n=91)
Loci	Insertion	Deletion	Ho	He	PM	PD	PE	PIC	TPI	HWE
HLD101	0.429	0.571	0.43956	0.4925	0.3605	0.6395	0.1399	0.3698	0.8922	0.3923
HLD111	0.132	0.868	0.24176	0.23022	0.617	0.383	0.0422	0.2027	0.6594	1
HLD114	0.291	0.709	0.40659	0.41509	0.4286	0.5714	0.118	0.3276	0.8426	1
HLD118	0.885	0.115	0.18681	0.20527	0.6614	0.3386	0.0263	0.1833	0.6149	0.32697
HLD122	0.181	0.819	0.31868	0.29852	0.5368	0.4632	0.0715	0.2528	0.7339	0.72733
HLD124	0.582	0.418	0.52747	0.4891	0.4035	0.5965	0.2127	0.3681	1.0581	0.51853
HLD125	0.412	0.588	0.53846	0.48722	0.4119	0.5881	0.2234	0.3672	1.0833	0.38754
HLD128	0.308	0.692	0.43956	0.42839	0.4242	0.5758	0.1399	0.3353	0.8922	1
HLD131	0.357	0.643	0.47253	0.46172	0.4032	0.5968	0.1646	0.3538	0.9479	1
HLD133	0.33	0.67	0.41758	0.44442	0.402	0.598	0.125	0.3443	0.8585	0.63666
HLD136	0.505	0.495	0.54945	0.5027	0.4035	0.5965	0.2346	0.375	1.1098	0.40431
HLD39	0.093	0.907	0.16484	0.1703	0.7066	0.2934	0.0209	0.155	0.5987	0.56198
HLD40	0.665	0.335	0.56044	0.44812	0.465	0.535	0.2461	0.3464	1.1375	0.01777
HLD45	0.621	0.379	0.49451	0.47338	0.4015	0.5985	0.1827	0.36	0.9891	0.82323
HLD48	0.418	0.582	0.43956	0.4891	0.3638	0.6362	0.1399	0.3681	0.8922	0.39002
HLD56	0.527	0.473	0.43956	0.50124	0.3518	0.6482	0.1399	0.3742	0.8922	0.29526
HLD58	0.484	0.516	0.43956	0.50222	0.3508	0.6492	0.1399	0.3747	0.8922	0.29336
HLD6	0.555	0.445	0.51648	0.49669	0.3897	0.6103	0.2023	0.372	1.0341	0.83208
HLD64	0.868	0.132	0.26374	0.23022	0.6116	0.3884	0.0497	0.2027	0.6791	0.35014
HLD67	0.791	0.209	0.30769	0.33222	0.5039	0.4961	0.0668	0.2758	0.7222	0.52726
HLD70	0.626	0.374	0.48352	0.47065	0.3991	0.6009	0.1735	0.3585	0.9681	0.82568
HLD77	0.473	0.527	0.37363	0.50124	0.3373	0.6627	0.0987	0.3742	0.7982	0.01951
HLD81	0.797	0.203	0.2967	0.32572	0.5114	0.4886	0.0622	0.2715	0.7109	0.51415
HLD83	0.33	0.67	0.46154	0.44442	0.416	0.584	0.156	0.3443	0.9286	0.81342
HLD84	0.742	0.258	0.38462	0.38522	0.4542	0.5458	0.1048	0.3097	0.8125	1
HLD88	0.549	0.451	0.52747	0.49784	0.3948	0.6052	0.2127	0.3725	1.0581	0.67204
HLD92	0.44	0.56	0.43956	0.49542	0.3576	0.6424	0.1399	0.3713	0.8922	0.29358
HLD93	0.599	0.401	0.47253	0.48309	0.382	0.618	0.1646	0.365	0.9479	1
HLD97	0.28	0.72	0.42857	0.40562	0.4435	0.5565	0.1323	0.322	0.875	0.79442
HLD99	0.912	0.088	0.15385	0.16125	0.7213	0.2787	0.0185	0.1475	0.5909	0.51367
CDP=0.9999999999750860
CPE=0.9867
PM（ match probability）； PD（ power of discrimination）； PE（ power of exclusion）； He（ expected heterozygosity）；Ho（observed heterozygosity）；PIC（ polymorphism information content）； TPI（ typical paternity index)； HWE (Hardy Weinberg equilibrium). P ＜（0.05/30 ≈0.00167）CPD (combined power of discrimination); CPE( combined power of paternity exclusion).
